# Supplementary material
Source: PubMed Central journal article supplement (PMC2040900)
Supplement: pnas_0702552104_5.pdf [file pnas_0702552104_5.pdf]

**Table 2. Summary of LTR and non-LTR families analyzed in this study.** Columns provide information on: sub-class (LTR or non-LTR), number of copies in alignment, total size of ORF sequence in alignment, total amount of genomic sequence surveyed, number of unique substitutions in first, second and third codon positions, total number of unique substitutions (including number in regions of overlapping ORFs), p-value that point substitutions occur at equal rates across codon positions, and status as a pseudogene-like ( $\psi$ ) family.

| Sub-class       | Family            | n     | Fragment (bp) | Total bp Surveyed | 1st | 2nd | 3rd     | Total Point Sub. | P (Ho)   | $\psi$ |
|-----------------|-------------------|-------|---------------|-------------------|-----|-----|---------|------------------|----------|--------|
| LTR             | <i>17.6</i>       | 11    | 5,833         | 61,024            | 18  | 22  | 19      | 61 (2)           | 0.806    | Y      |
|                 | <i>297</i>        | 40    | 5,758         | 185,361           | 142 | 121 | 211     | 479 (5)          | 4.89E-07 | N      |
|                 | <i>3S18</i>       | 6     | 4,824         | 22,218            | 94  | 92  | 171     | 357              | 3.68E-08 | N      |
|                 | <i>412</i>        | 24    | 4,979         | 117,021           | 5   | 7   | 8       | 21 (1)           | 0.704    | Y      |
|                 | <i>blood</i>      | 22    | 4,871         | 107,165           | 4   | 6   | 8       | 19 (1)           | 0.512    | Y      |
|                 | <i>Burdock</i>    | 13    | 4,556         | 36,689            | 0   | 1   | 1       | 2                | 0.606    | Y      |
|                 | <i>copia</i>      | 28    | 4,230         | 117,442           | 10  | 7   | 18      | 35               | 0.062    | Y      |
|                 | <i>diver</i>      | 9     | 5,244         | 47,066            | 8   | 4   | 4       | 16               | 0.369    | Y      |
|                 | <i>flea</i>       | 16    | 4,002         | 57,149            | 8   | 6   | 9       | 23               | 0.737    | Y      |
|                 | <i>gtwin</i>      | 4     | 4,041         | 13,591            | 5   | 6   | 21      | 32               | 5.36E-04 | N      |
|                 | <i>HMS-Beagle</i> | 10    | 4,523         | 42,735            | 0   | 0   | 5       | 5                | 6.75E-03 | N      |
|                 | <i>Idefix</i>     | 5     | 5,772         | 19,118            | 34  | 35  | 62      | 138 (7)          | 2.45E-03 | N      |
|                 | <i>invader2</i>   | 6     | 4,413         | 21,910            | 66  | 73  | 76      | 215              | 0.649    | Y      |
|                 | <i>invader3</i>   | 6     | 4,710         | 16,205            | 16  | 14  | 37      | 67               | 6.53E-04 | N      |
|                 | <i>mdg1</i>       | 13    | 4,925         | 64,026            | 1   | 4   | 10      | 15               | 1.49E-02 | N      |
|                 | <i>mdg3</i>       | 10    | 4,908         | 50,010            | 8   | 5   | 8       | 21               | 0.650    | Y      |
|                 | <i>micropia</i>   | 4     | 4,023         | 10,481            | 7   | 5   | 5       | 17               | 0.794    | Y      |
|                 | <i>opus</i>       | 16    | 4,406         | 57,453            | 4   | 6   | 1       | 12 (1)           | 0.178    | Y      |
|                 | <i>Quasimodo</i>  | 7     | 5,628         | 37,095            | 8   | 4   | 19      | 33 (2)           | 2.72E-03 | N      |
|                 | <i>roo</i>        | 86    | 7,458         | 632,098           | 118 | 111 | 120     | 349              | 0.789    | Y      |
| <i>rover</i>    | 3                 | 5,201 | 15,958        | 3                 | 2   | 4   | 9       | 0.717            | Y        |        |
| <i>springer</i> | 7                 | 5,984 | 34,742        | 105               | 60  | 272 | 438 (1) | 3.85E-39         | N        |        |
| <i>Stalker</i>  | 4                 | 4,862 | 15,650        | 2                 | 3   | 6   | 11      | 0.307            | Y        |        |

|             |                   |     |       |           |       |       |       |            |          |   |
|-------------|-------------------|-----|-------|-----------|-------|-------|-------|------------|----------|---|
|             | <i>Stalker2</i>   | 8   | 4,889 | 46,055    | 0     | 0     | 5     | 5          | 6.73E-03 | N |
|             | <i>Tabor</i>      | 3   | 4,949 | 10,713    | 2     | 1     | 1     | 4          | 0.780    | Y |
|             | <i>Tirant</i>     | 20  | 6,102 | 117,349   | 8     | 8     | 18    | 34         | 0.053    | Y |
|             | <i>Transpac</i>   | 4   | 4,172 | 16,689    | 1     | 0     | 1     | 2          | 0.606    | Y |
|             | All LTR           | 385 |       | 1,973,013 | 677   | 603   | 1,120 | 2,420 (20) | 2.18E-44 | N |
|             | ψ LTR             | 279 |       | 1,491,867 | 272   | 267   | 307   | 851 (5)    | 0.159    | Y |
| non-LTR     | <i>baggins</i>    | 6   | 1,801 | 6,257     | 71    | 55    | 53    | 179        | 0.179    | Y |
|             | <i>BS</i>         | 15  | 4,625 | 36,932    | 53    | 54    | 66    | 173        | 0.359    | Y |
|             | <i>Cr1a</i>       | 36  | 3,860 | 43,592    | 440   | 426   | 412   | 1,301 (23) | 0.733    | Y |
|             | <i>Doc</i>        | 53  | 4,364 | 192,348   | 40    | 38    | 55    | 133        | 0.132    | Y |
|             | <i>Doc3</i>       | 7   | 3,526 | 9,458     | 37    | 40    | 40    | 117        | 0.935    | Y |
|             | <i>F-element</i>  | 41  | 4,370 | 135,266   | 109   | 81    | 187   | 377        | 7.79E-12 | N |
|             | <i>G2</i>         | 12  | 2,700 | 16,779    | 25    | 25    | 49    | 99         | 1.43E-03 | N |
|             | <i>G4</i>         | 10  | 1,165 | 5,204     | 35    | 34    | 33    | 102        | 0.968    | Y |
|             | <i>G5</i>         | 8   | 2,879 | 5,807     | 13    | 8     | 14    | 35         | 0.405    | Y |
|             | <i>Helena</i>     | 7   | 1,317 | 4,670     | 56    | 52    | 67    | 175        | 0.295    | Y |
|             | <i>I-element</i>  | 21  | 4,959 | 68,396    | 98    | 89    | 171   | 358        | 1.07E-08 | N |
|             | <i>Ivk</i>        | 6   | 5,004 | 24,594    | 89    | 110   | 153   | 352        | 7.05E-05 | N |
|             | <i>jockey</i>     | 68  | 4,454 | 107,209   | 23    | 13    | 31    | 67         | 2.61E-02 | N |
|             | <i>jockey2</i>    | 7   | 1,288 | 4,335     | 42    | 37    | 33    | 112        | 0.562    | Y |
|             | <i>Juan</i>       | 9   | 3,805 | 28,145    | 4     | 2     | 8     | 14         | 0.135    | Y |
|             | <i>R1-element</i> | 7   | 4,409 | 16,729    | 35    | 28    | 55    | 118        | 3.14E-03 | N |
|             | <i>Rt1a</i>       | 13  | 4,417 | 33,035    | 103   | 107   | 171   | 383 (2)    | 3.13E-06 | N |
|             | <i>Rt1b</i>       | 28  | 4,444 | 57,522    | 189   | 163   | 230   | 585 (3)    | 2.38E-04 | N |
|             | <i>X-element</i>  | 23  | 4,232 | 40,541    | 53    | 62    | 89    | 204        | 2.26E-03 | N |
|             | All non-LTR       | 377 |       | 836,819   | 1,515 | 1,424 | 1,917 | 4,884 (28) | 3.56E-24 | N |
|             | ψ non-LTR         | 158 |       | 336,748   | 791   | 746   | 781   | 2,341 (23) | 0.192    | Y |
| Grand Total |                   | 762 |       | 2,809,832 | 2,192 | 2,027 | 3,037 | 7,304 (48) | 5.18E-61 | N |
| Total ψ     |                   | 437 |       | 1,828,615 | 1,063 | 1,013 | 1,088 | 3,192 (28) | 0.060    | Y |
