# Supplementary material
Source: PubMed Central journal article supplement (PMC2040900)

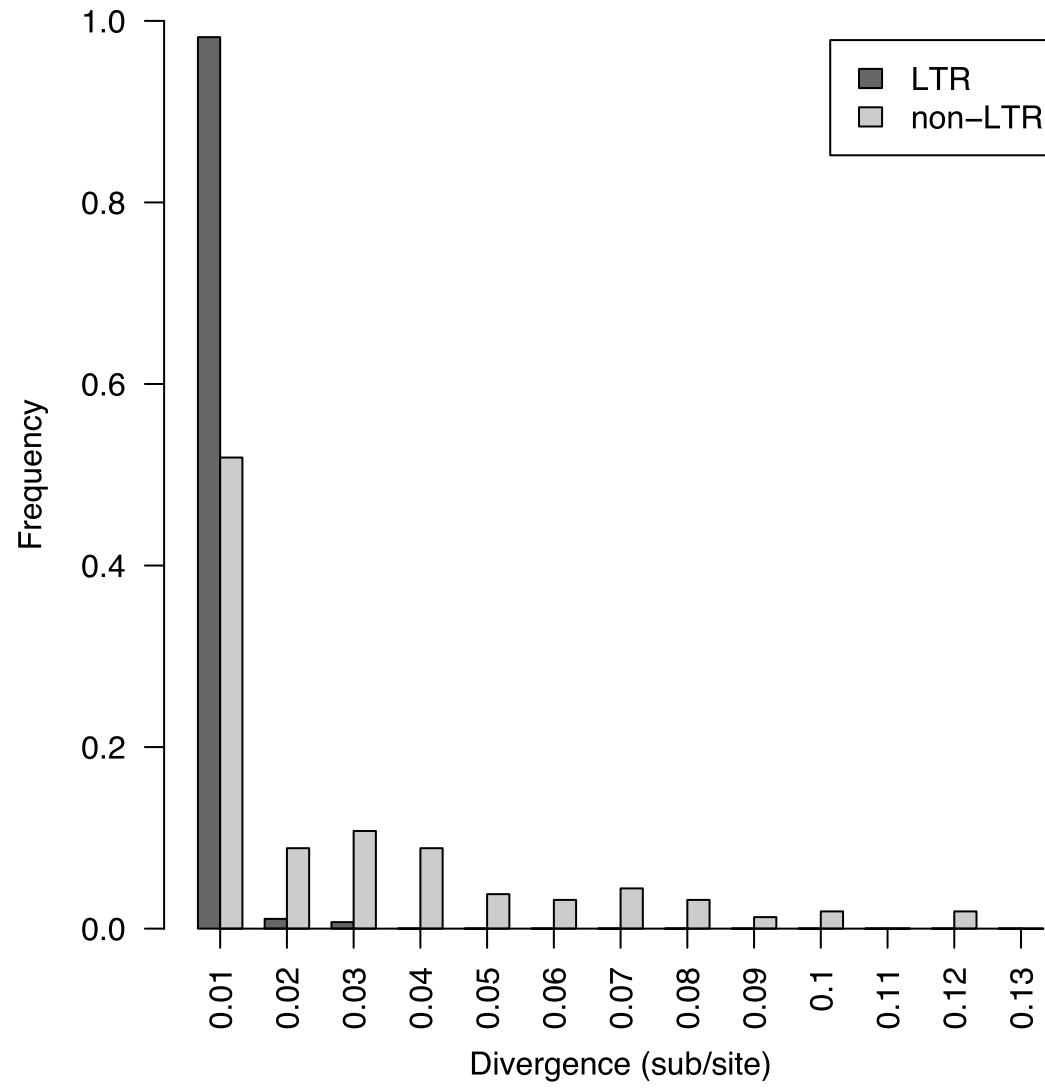

Supplement: pnas_0702552104_1.pdf [file pnas_0702552104_1.pdf]

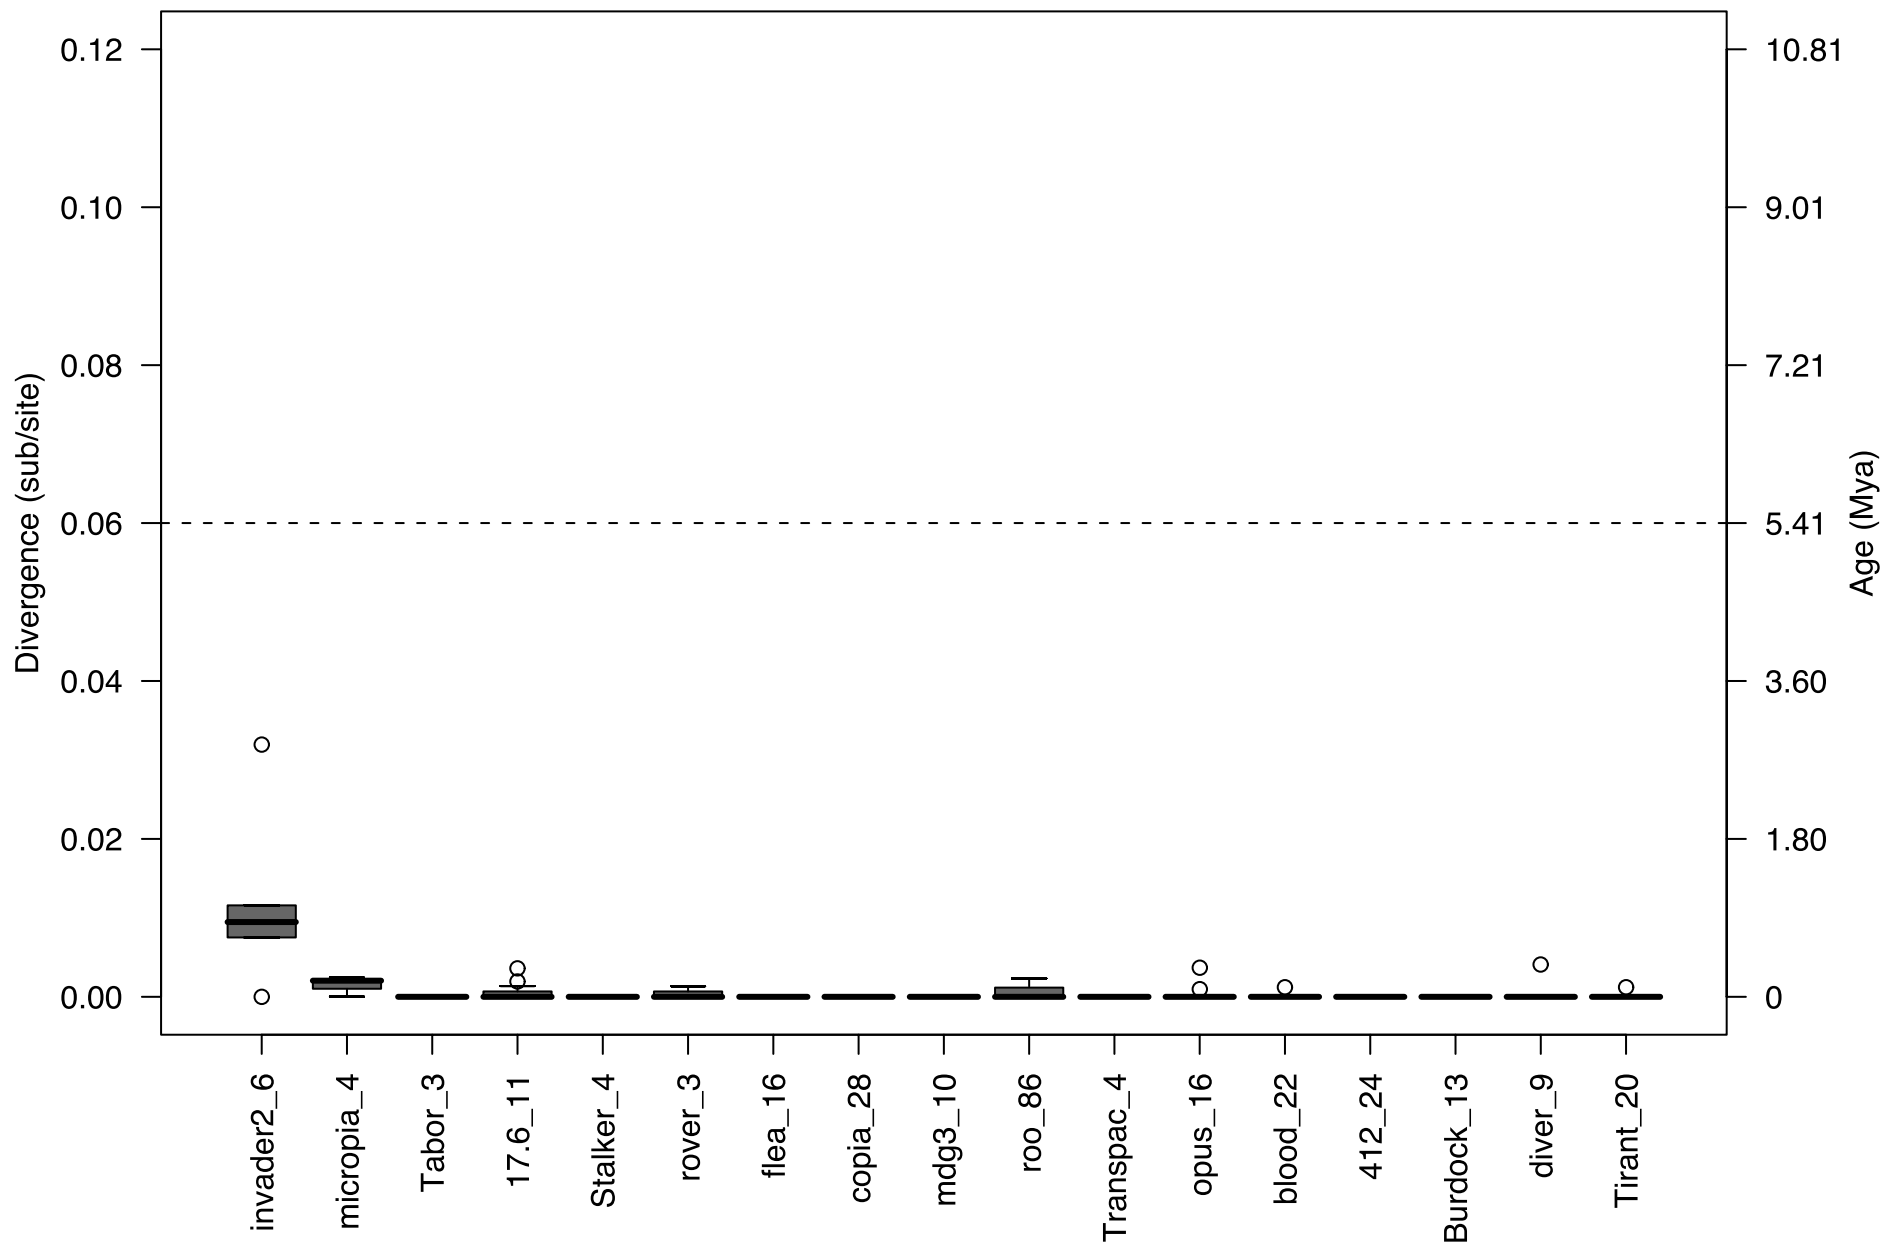

Supplement: pnas_0702552104_2.pdf [file pnas_0702552104_2.pdf]

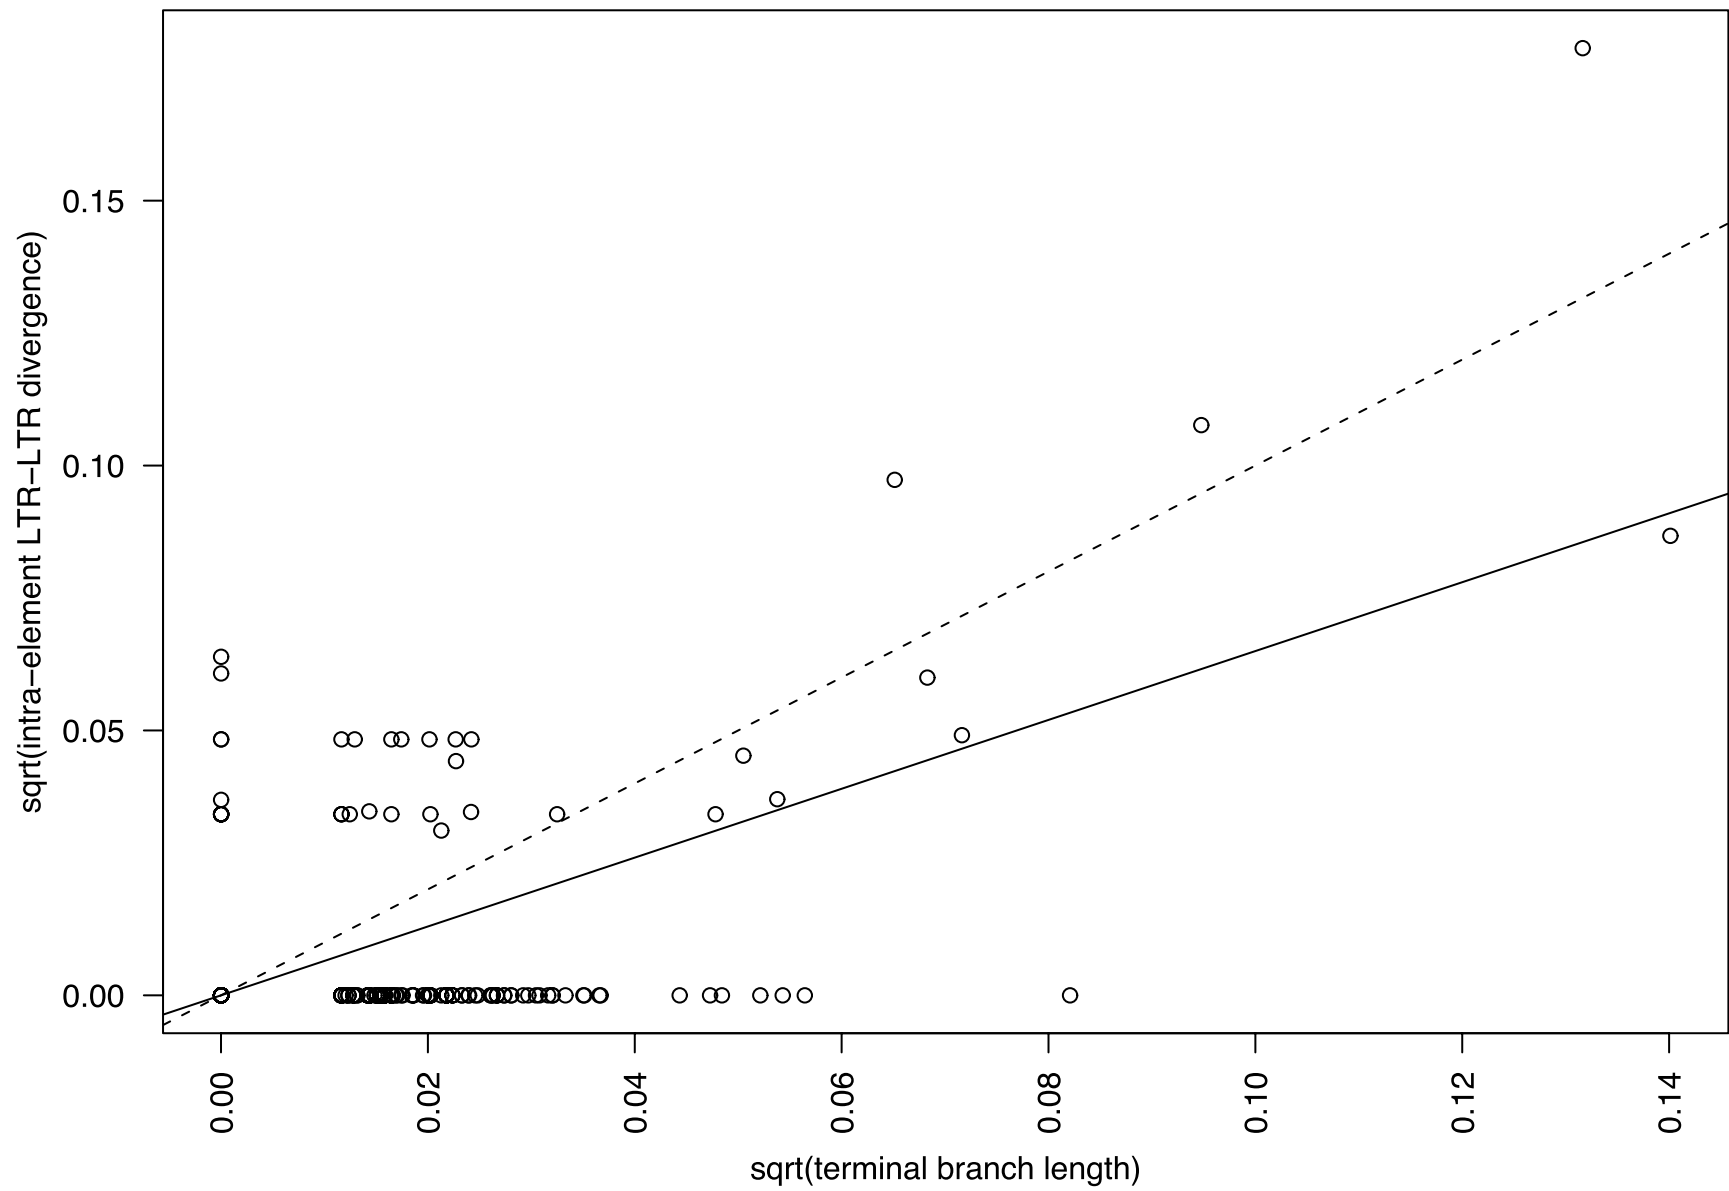

Supplement: pnas_0702552104_3.pdf [file pnas_0702552104_3.pdf]

**A**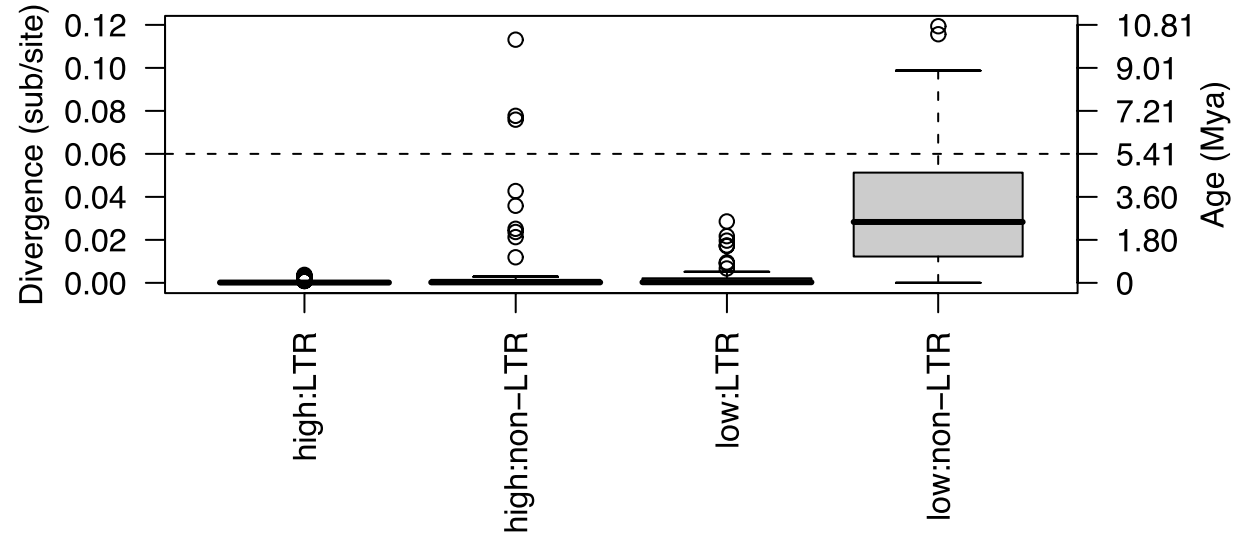**B**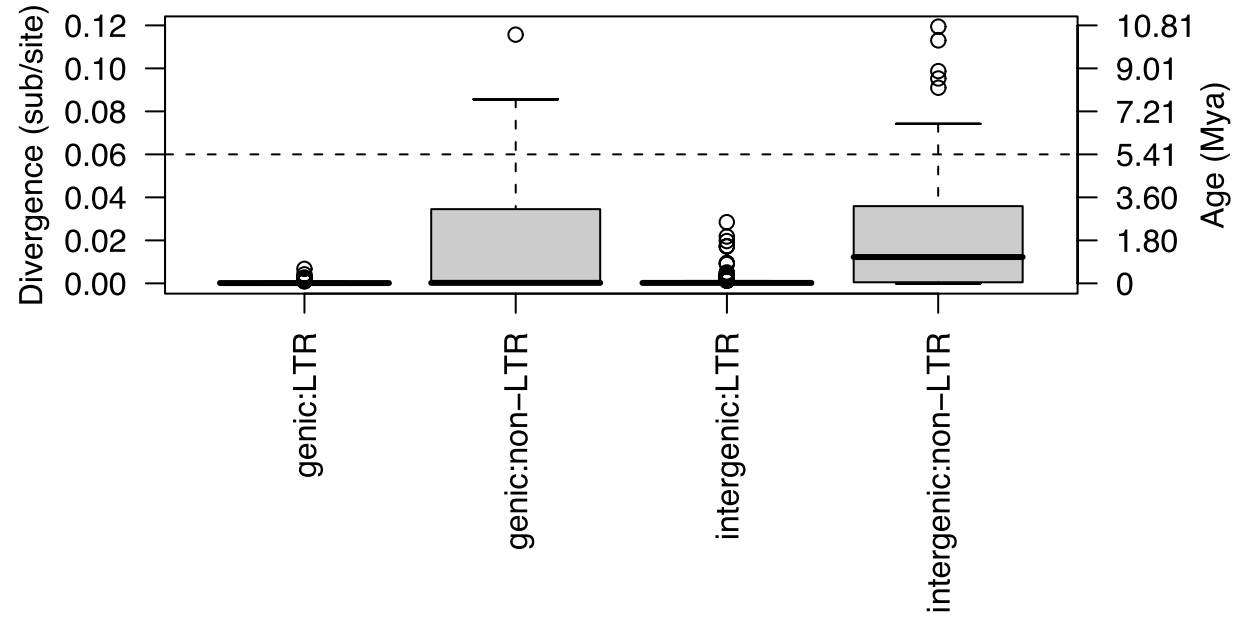

Supplement: pnas_0702552104_4.pdf [file pnas_0702552104_4.pdf]
